# Supplementary material for: Design, preparation, and combustion performance of energetic catalysts based on transition metal ions (Cu2+, Co2+, Fe2+) and 3-aminofurazan-4-carboxylic acid
Source: Royal Society of Chemistry journal article supplement (doi:10.1039/d3ra03585a), 2023-01-01
Supplement: d3ra03585a1.pdf [file d3ra03585a1.pdf]

## Electronic Supplementary Information

### **Design, crystal structure, and catalytic mechanism of energetic combustion catalysts based on transition metal ions ( $\text{Cu}^{2+}$ , $\text{Co}^{2+}$ , $\text{Fe}^{2+}$ ) and 3-aminofurazan-4-carboxylic acid**

Wei Liu,<sup>\*a</sup> Yuangang Xu,<sup>\*b</sup> Yulong Zhang,<sup>c</sup> Hanyue Zheng,<sup>c</sup> Xiaodong Gou<sup>a</sup>, and Fei Xiao<sup>a</sup>

<sup>a</sup> School of Environmental and Safety Engineering, North University of China, Taiyuan, Shanxi, China.

<sup>b</sup> School of Chemistry and Chemical Engineering, Nanjing University of Science and Technology, Nanjing, Jiangsu, China.

<sup>c</sup> China North Industry Advanced Technology Generalization Institute, Beijing, China.

\* Corresponding authors. E-mail addresses: 1104054142@st.nuc.edu.cn (W. Liu), yuangangxu@163.com (Y. Xu).

| <b>Table of Contents</b> |                                                                                                                        |        |
|--------------------------|------------------------------------------------------------------------------------------------------------------------|--------|
| 1.                       | Single-crystal X-ray Diffraction Analysis of $\text{Cu}(\text{H}_2\text{O})_4(\text{AFCA})_2 \cdot \text{H}_2\text{O}$ | page 3 |
| 2.                       | Single-crystal X-ray Diffraction Analysis of $\text{Co}(\text{H}_2\text{O})_4(\text{AFCA})_2 \cdot \text{H}_2\text{O}$ | page 5 |
| 3.                       | Single-crystal X-ray Diffraction Analysis of $\text{Fe}(\text{H}_2\text{O})_4(\text{AFCA})_2 \cdot \text{H}_2\text{O}$ | page 7 |

# 1. Single-crystal X-ray Diffraction Analysis of $\text{Cu}(\text{H}_2\text{O})_4(\text{AFCA})_2 \cdot \text{H}_2\text{O}$

Table S1. Selected bond lengths [ $\text{\AA}$ ] of  $\text{Cu}(\text{H}_2\text{O})_4(\text{AFCA})_2 \cdot \text{H}_2\text{O}$

| parameter            | Length ( $\text{\AA}$ ) |
|----------------------|-------------------------|
| Cu1-O2W <sup>i</sup> | 1.976 (3)               |
| Cu1-O2W              | 1.976 (3)               |
| Cu1-O1W              | 2.313 (3)               |
| Cu1-O1W <sup>i</sup> | 2.313 (3)               |
| Cu1-N1 <sup>i</sup>  | 2.022 (3)               |
| Cu1-N1               | 2.022 (3)               |
| O2W-H2WA             | 0.8674                  |
| O2W-H2WB             | 0.8665                  |
| O1W-H1WA             | 0.8775                  |
| O1W-H1WB             | 0.8774                  |
| O3W-H3WA             | 0.8699                  |
| O3W-H3WB             | 0.8700                  |
| O3-N1                | 1.421 (5)               |
| O3-N2                | 1.364 (5)               |
| O1-C3                | 1.262 (5)               |
| O2-C3                | 1.227 (6)               |
| N1-C1                | 1.316 (5)               |
| N3-H3A               | 0.8800                  |
| N3-H3B               | 0.8800                  |
| N3-C1                | 1.313 (6)               |
| N2-C2                | 1.292 (6)               |
| C1-C2                | 1.454 (6)               |
| C2-C3                | 1.505 (6)               |

Table S2. Selected bond angles [ $^{\circ}$ ] for  $\text{Cu}(\text{H}_2\text{O})_4(\text{AFCA})_2 \cdot \text{H}_2\text{O}$ 

| parameter                              | bond angle ( $^{\circ}$ ) | parameter     | bond angle ( $^{\circ}$ ) |
|----------------------------------------|---------------------------|---------------|---------------------------|
| O2W <sup>i</sup> -Cu1-O2W              | 180.0                     | H1WA-O1W-H1WB | 109.0                     |
| O2W <sup>i</sup> -Cu1-O1W <sup>i</sup> | 86.66 (13)                | H3WA-O3W-H3WB | 109.5                     |
| O2W-Cu1-O1W <sup>i</sup>               | 93.34 (13)                | N2-O3-N1      | 109.7 (3)                 |
| O2W <sup>i</sup> -Cu1-O1W              | 93.34 (13)                | O3-N1-Cu1     | 116.7 (3)                 |
| O2W-Cu1-O1W                            | 86.66 (13)                | C1-N1-Cu1     | 137.1 (3)                 |
| O2W <sup>i</sup> -Cu1-N1 <sup>i</sup>  | 88.48 (13)                | C1-N1-O3      | 106.2 (3)                 |
| O2W <sup>i</sup> -Cu1-N1               | 91.52 (13)                | H3A-N3-H3B    | 120.0                     |
| O2W-Cu1-N1                             | 88.48 (13)                | C1-N3-H3A     | 120.0                     |
| O2W-Cu1-N1 <sup>i</sup>                | 91.52 (13)                | C1-N3-H3B     | 120.0                     |
| O1W-Cu1-O1W <sup>i</sup>               | 180.0                     | C2-N2-O3      | 107.4 (4)                 |
| N1-Cu1-O1W <sup>i</sup>                | 91.55 (13)                | N1-C1-C2      | 107.1 (4)                 |
| N1 <sup>i</sup> -Cu1-O1W               | 91.55 (13)                | N3-C1-N1      | 126.2 (4)                 |
| N1 <sup>i</sup> -Cu1-O1W <sup>i</sup>  | 88.45 (13)                | N3-C1-C2      | 126.6 (4)                 |
| N1-Cu1-O1W                             | 88.45 (13)                | N2-C2-C1      | 109.7 (4)                 |
| N1 <sup>i</sup> -Cu1-N1                | 180.0                     | N2-C2-C3      | 123.3 (4)                 |
| Cu1-O2W-H2WA                           | 110.7                     | C1-C2-C3      | 127.1 (4)                 |
| Cu1-O2W-H2WB                           | 110.5                     | O1-C3-C2      | 116.3 (4)                 |
| H2WA-O2W-H2WB                          | 108.3                     | O2-C3-O1      | 127.7 (4)                 |
| Cu1-O1W-H1WA                           | 109.8                     | O2-C3-C2      | 116.1 (4)                 |
| Cu1-O1W-H1WB                           | 110.0                     |               |                           |

## 2. Single-crystal X-ray Diffraction Analysis of $\text{Co}(\text{H}_2\text{O})_4(\text{AFCA})_2 \cdot \text{H}_2\text{O}$

Table S3. Selected bond lengths [ $\text{\AA}$ ] of  $\text{Co}(\text{H}_2\text{O})_4(\text{AFCA})_2 \cdot \text{H}_2\text{O}$

| parameter    | Length ( $\text{\AA}$ ) |
|--------------|-------------------------|
| Co(1)-O(4)#1 | 2.0769(15)              |
| Co(1)-O(4)   | 2.0769(15)              |
| Co(1)-O(4)#2 | 2.0769(15)              |
| Co(1)-O(4)#3 | 2.0769(15)              |
| Co(1)-N(3)   | 2.137(2)                |
| Co(1)-N(3)#1 | 2.137(2)                |
| O(1)-C(1)    | 1.234(4)                |
| O(2)-C(1)    | 1.263(4)                |
| O(3)-N(2)    | 1.369(4)                |
| O(3)-N(3)    | 1.415(3)                |
| O(4)-H(4A)   | 0.8691                  |
| O(4)-H(4B)   | 0.8692                  |
| N(1)-C(3)    | 1.338(4)                |
| N(1)-H(1A)   | 0.8603                  |
| N(1)-H(1B)   | 0.8598                  |
| N(2)-C(2)    | 1.287(4)                |
| N(3)-C(3)    | 1.315(4)                |
| C(1)-C(2)    | 1.502(4)                |
| C(2)-C(3)    | 1.436(4)                |

Table S4. Selected bond angles [ $^{\circ}$ ] for  $\text{Co}(\text{H}_2\text{O})_4(\text{AFCA})_2 \cdot \text{H}_2\text{O}$ 

| parameter           | bond angel ( $^{\circ}$ ) | parameter        | bond angel ( $^{\circ}$ ) |
|---------------------|---------------------------|------------------|---------------------------|
| O(4)#1-Co(1)-O(4)   | 180.00(9)                 | H(4A)-O(4)-H(4B) | 108.2                     |
| O(4)#1-Co(1)-O(4)#2 | 87.32(9)                  | C(3)-N(1)-H(1A)  | 120.3                     |
| O(4)-Co(1)-O(4)#2   | 92.68(9)                  | C(3)-N(1)-H(1B)  | 119.7                     |
| O(4)#1-Co(1)-O(4)#3 | 92.68(9)                  | H(1A)-N(1)-H(1B) | 120                       |
| O(4)-Co(1)-O(4)#3   | 87.32(9)                  | C(2)-N(2)-O(3)   | 107.1(3)                  |
| O(4)#2-Co(1)-O(4)#3 | 180                       | C(3)-N(3)-O(3)   | 105.2(2)                  |
| O(4)#1-Co(1)-N(3)   | 91.47(6)                  | C(3)-N(3)-Co(1)  | 137.8(2)                  |
| O(4)-Co(1)-N(3)     | 88.53(6)                  | O(3)-N(3)-Co(1)  | 117.05(16)                |
| O(4)#2-Co(1)-N(3)   | 91.47(6)                  | O(1)-C(1)-O(2)   | 127.3(3)                  |
| O(4)#3-Co(1)-N(3)   | 88.53(6)                  | O(1)-C(1)-C(2)   | 115.6(3)                  |
| O(4)#1-Co(1)-N(3)#1 | 88.53(6)                  | O(2)-C(1)-C(2)   | 117.1(3)                  |
| O(4)-Co(1)-N(3)#1   | 91.47(6)                  | N(2)-C(2)-C(3)   | 109.6(3)                  |
| O(4)#2-Co(1)-N(3)#1 | 88.53(6)                  | N(2)-C(2)-C(1)   | 122.5(3)                  |
| O(4)#3-Co(1)-N(3)#1 | 91.47(6)                  | C(3)-C(2)-C(1)   | 127.9(3)                  |
| N(3)-Co(1)-N(3)#1   | 180                       | N(3)-C(3)-N(1)   | 125.0(3)                  |
| N(2)-O(3)-N(3)      | 109.9(2)                  | N(3)-C(3)-C(2)   | 108.3(2)                  |
| Co(1)-O(4)-H(4A)    | 110.7                     | N(1)-C(3)-C(2)   | 126.7(3)                  |
| Co(1)-O(4)-H(4B)    | 110.5                     | H(5A)-O(5)-H(5B) | 108.6                     |

### 3. Single-crystal X-ray Diffraction Analysis of $\text{Fe}(\text{H}_2\text{O})_4(\text{AFCA})_2 \cdot \text{H}_2\text{O}$

Table S5. Selected bond lengths [ $\text{\AA}$ ] of  $\text{Fe}(\text{H}_2\text{O})_4(\text{AFCA})_2 \cdot \text{H}_2\text{O}$

| parameter                                         | Length ( $\text{\AA}$ ) |
|---------------------------------------------------|-------------------------|
| $\text{Fe}_{(1)}\text{-O}_{(1\text{W})}$          | 2.1118(19)              |
| $\text{Fe}_{(1)}\text{-O}_{(1\text{W})}^1$        | 2.1118(19)              |
| $\text{Fe}_{(1)}\text{-O}_{(1\text{W})}^2$        | 2.1118(19)              |
| $\text{Fe}_{(1)}\text{-O}_{(1\text{W})}^3$        | 2.1118(19)              |
| $\text{Fe}_{(1)}\text{-N}_{(1)}$                  | 2.148(3)                |
| $\text{Fe}_{(1)}\text{-N}_{(1)}^3$                | 2.148(3)                |
| $\text{O}_{(1)}\text{-N}_{(1)}$                   | 1.428(4)                |
| $\text{O}_{(1)}\text{-N}_{(3)}$                   | 1.369(4)                |
| $\text{O}_{(2)}\text{-C}_{(00\text{C})}$          | 1.270(4)                |
| $\text{O}_{(3)}\text{-C}_{(00\text{C})}$          | 1.237(5)                |
| $\text{N}_{(1)}\text{-C}_{(00\text{B})}$          | 1.315(5)                |
| $\text{N}_{(2)}\text{-C}_{(00\text{B})}$          | 1.328(5)                |
| $\text{N}_{(3)}\text{-C}_{(00\text{A})}$          | 1.287(5)                |
| $\text{C}_{(00\text{A})}\text{-C}_{(00\text{B})}$ | 1.440(5)                |
| $\text{C}_{(00\text{A})}\text{-C}_{(00\text{C})}$ | 1.504(5)                |

Table S6. Selected bond angles [°] for Fe(H<sub>2</sub>O)<sub>4</sub>(AFCA)<sub>2</sub>·H<sub>2</sub>O

| parameter                                                                         | bond angle (°) | parameter                                                  | bond angle (°) |
|-----------------------------------------------------------------------------------|----------------|------------------------------------------------------------|----------------|
| O <sub>(1W)</sub> -Fe <sub>(1)</sub> -O <sub>(1W)</sub> <sup>1</sup>              | 180.0          | N <sub>(3)</sub> -O <sub>(1)</sub> -N <sub>(1)</sub>       | 110.1(3)       |
| O <sub>(1W)</sub> <sup>1</sup> -Fe <sub>(1)</sub> -O <sub>(1W)</sub> <sup>2</sup> | 92.00(11)      | O <sub>(1)</sub> -N <sub>(1)</sub> -Fe <sub>(1)</sub>      | 117.5(2)       |
| O <sub>(1W)</sub> -Fe <sub>(1)</sub> -O <sub>(1W)</sub> <sup>2</sup>              | 88.00(11)      | C <sub>(00B)</sub> -N <sub>(1)</sub> -Fe <sub>(1)</sub>    | 137.7(3)       |
| O <sub>(1W)</sub> <sup>1</sup> -Fe <sub>(1)</sub> -O <sub>(1W)</sub> <sup>3</sup> | 88.00(11)      | C <sub>(00B)</sub> -N <sub>(1)</sub> -O <sub>(1)</sub>     | 104.8(3)       |
| O <sub>(1W)</sub> -Fe <sub>(1)</sub> -O <sub>(1W)</sub> <sup>3</sup>              | 92.00(11)      | C <sub>(00A)</sub> -N <sub>(3)</sub> -O <sub>(1)</sub>     | 106.9(3)       |
| O <sub>(1W)</sub> <sup>2</sup> -Fe <sub>(1)</sub> -O <sub>(1W)</sub> <sup>3</sup> | 180.0          | N <sub>(3)</sub> -C <sub>(00A)</sub> -C <sub>(00B)</sub>   | 109.9(3)       |
| O <sub>(1W)</sub> <sup>2</sup> -Fe <sub>(1)</sub> -N <sub>(1)</sub>               | 91.73(8)       | N <sub>(3)</sub> -C <sub>(00A)</sub> -C <sub>(00C)</sub>   | 122.3(3)       |
| O <sub>(1W)</sub> <sup>3</sup> -Fe <sub>(1)</sub> -N <sub>(1)</sub>               | 88.27(8)       | C <sub>(00B)</sub> -C <sub>(00A)</sub> -C <sub>(00C)</sub> | 127.9(4)       |
| O <sub>(1W)</sub> <sup>2</sup> -Fe <sub>(1)</sub> -N <sub>(1)</sub> <sup>1</sup>  | 88.27(8)       | N <sub>(1)</sub> -C <sub>(00B)</sub> -N <sub>(2)</sub>     | 125.1(3)       |
| O <sub>(1W)</sub> <sup>1</sup> -Fe <sub>(1)</sub> -N <sub>(1)</sub> <sup>1</sup>  | 91.73(8)       | N <sub>(1)</sub> -C <sub>(00B)</sub> -C <sub>(00A)</sub>   | 108.4(3)       |
| O <sub>(1W)</sub> -Fe <sub>(1)</sub> -N <sub>(1)</sub>                            | 91.73(8)       | N <sub>(2)</sub> -C <sub>(00B)</sub> -C <sub>(00A)</sub>   | 126.5(4)       |
| O <sub>(1W)</sub> <sup>1</sup> -Fe <sub>(1)</sub> -N <sub>(1)</sub>               | 88.27(8)       | O <sub>(2)</sub> -C <sub>(00C)</sub> -C <sub>(00A)</sub>   | 116.2(4)       |
| O <sub>(1W)</sub> <sup>3</sup> -Fe <sub>(1)</sub> -N <sub>(1)</sub> <sup>1</sup>  | 91.73(8)       | O <sub>(3)</sub> -C <sub>(00C)</sub> -O <sub>(2)</sub>     | 127.9(4)       |
| O <sub>(1W)</sub> -Fe <sub>(1)</sub> -N <sub>(1)</sub> <sup>1</sup>               | 88.27(8)       | O <sub>(3)</sub> -C <sub>(00C)</sub> -C <sub>(00A)</sub>   | 115.9(3)       |
| N <sub>(1)</sub> -Fe <sub>(1)</sub> -N <sub>(1)</sub> <sup>1</sup>                | 180.00(3)      |                                                            |                |
